# Supplementary material
Source: Copernicus journal article supplement (doi:10.5194/egusphere-2023-2889)
Supplement: Supplementary file [file egusphere-2023-2889-AC1-supplement.pdf]

## General Comments

This is a compact contribution that re-introduces the idea of configurational entropy to quantify mixing to the geosciences. The concept of configurational entropy to quantify mixing has been discussed in the geoscience literature before, and citations to such work are provided in the text. Where this extends on earlier work is that it extends the equations to cases where one has more than two types of objects / particles. This is a potentially very useful extension. They also go through some simple cases in the appendix which can help solidify the reader's understanding. The manuscript is concise and well written.

The work, after defining the equations for configurational entropy in such cases, applies it to 2D annulus mantle convection simulations. These simulations have already been published elsewhere. These examples show how the global entropy measure quantifies mixing in a single number – and shows visually that both the local and global measure of configurational entropy correspond qualitatively with the amount of mixing observed. The work is not sufficiently extensive to talk in detail about the implications for mantle mixing, and the authors do not attempt that, but it does allow them to speculate about future uses.

It is unclear how useful this measure will be though. We will need to wait to see how researchers use it. It is also unclear what the absolute value means, and it is dependent on spatial resolution (as mentioned by the authors).

We thank the reviewer for the comments provided and we are pleased that our approach and aim of the manuscript came across.

The contribution could have taken the opportunity to discuss how the work here relates to the wider body of mantle mixing studies (e.g. Kellogg and Turcotte, McKenzie, Davies and Gurnis, Ferrachat and Ricard, Samuel and Farnetani, Tackley, van Keken, Olson, etc) . This literature is extensive, and some of it relates (indirectly) to configurational entropy. While these earlier studies do need to be better recognised here, careful consideration should be given as to the extent of additional description. While significant additional description of earlier mixing studies would make for a more rounded contribution, especially if the discussion section tried to draw relationships from this work with earlier work introduced in an extended introduction. Such additional material though could potentially detract the reader from what is now a tight and focussed contribution. Therefore if the authors cannot see a way to make this a much more significant contribution by relating it to earlier work, then I would suggest that they restrict themselves to succinctly acknowledging and summarising the earlier work in this general field of mantle mixing to maintain its clear and concise form.

We agree with the reviewer that previous studies regarding mantle mixing have not been mentioned enough in our manuscript. We therefore added numerous examples of mixing studies to our introduction (see excerpt below) to provide the reader with a broader overview of quantifying mixing. However, except for the ones already cited in the paper, none of these additional studies use entropy as a measure and we feel comparing the various methods in detail goes beyond the scope of our study of reintroducing configurational entropy to the geoscience community.

*Excerpt 1: "While mixing technically involves diffusion at small scales and the term stirring has been proposed to account for the mechanical stretching and folding (Farnetani & Samuel, 2003), which is*

*infact our interest here, we shall nevertheless use the term mixing in the remainder of the manuscript as we use varying 'compositions' that are able to mix.*

*It has long been recognized that mantle convection is complex, and its mixing has been studied for decades, see (Kellogg, 1993; van Keken et al., 2003) for early reviews on this topic. Unsurprisingly, the advent of high-performance numerical modelling in the mid-90's saw a resurgence in the characterization of mantle mixing and its quantification. Various approaches have been proposed over the years, but the vast majority of these are based on the time evolution of a swarm of particles. Early studies (such as Hoffman & McKenzie, 1985; Olson et al., 1984a, 1984b; Richter et al., 1982; Schmalzl et al., 1996) use statistics to arrive at a mixing time scale. Another approach using the presence, addition, and/or removal of particles in a modelled domain is used to quantify mixing-times and degassing (sampling of primitive mantle) (Gottschaldt et al., 2006; Gurnis & Davies, 1986a, 1986b), to measure strain and the dispersal of tracers (Christensen, 1989; Kellogg & Turcotte, 1990) or to study the development of time-dependent mantle-heterogeneities (Hunt & Kellogg, 2001). Note that other methods have been proposed, such as a line method (Ten et al., 1998), a correlation dimension method (Stegman et al., 2002) and a hyperbolic persistence time method (Farnetani & Samuel, 2003).*

*More recently another approach has dominated the mantle mixing literature: it consists in measuring the Lyapunov time, which is the characteristic timescale for which a dynamical system is chaotic, or rather its inverse the Lyapunov exponent. It can be shown that mixing is laminar or turbulent by evaluating the Lyapunov exponent, the larger the exponent the more efficient the mixing is. A typical example uses a steady state velocity pattern obtained in a 3D spherical domain to advect passive particles (van Keken & Zhong, 1999). They use a very common approximation to the Lyapunov exponent, i.e., the Finite Time Lyapunov Exponent, which is based on the evaluation of the distance between a multitude of particle pairs that are initially very close to each other (i.e., stretching of this original distance after 4 Ga). This shows a strong diversity in mixing behavior dependent on the mantle flow characteristics. Other studies that used the same approach in studying a variety of mantle convection problems include: (Bello et al., 2014; Bocher et al., 2016; Colli et al., 2015; Coltice, 2005; Coltice & Schmalzl, 2006; Farnetani et al., 2002; Farnetani & Samuel, 2003; Ferrachat & Ricard, 1998, 2001; Samuel et al., 2011; Tackley & Xie, 2002; Thomas et al., 2024)."*

Overall, my assessment is that this is a useful contribution that deserves to be in the literature but only time will tell how significant it really will be. In this context we note that uses to date of earlier versions of configurational entropy have been limited in the geosciences, but maybe the additional flexibility of the measures presented here will encourage greater use.

### **Specific Comments**

L 11 – Unclear how the measure can 'validate' a numerical model? Also unclear how can a model be 'validated' against local anomalies in the mantle inferred from other observations? We agree with the comment and therefore changed the word 'validated' to 'compare'. We see an opportunity to test models that are driven by e.g., known plate motions to be compared with seismological or geochemical observations. For example, regional subduction models may cause the preservation of subducted lithosphere in the (lower) mantle. How such a slab interacts with the mantle, causing mixing in melts or in the seismic velocities of the mantle may be observed locally, and may also be tested/compared with an easily adaptable mixing quantity like configurational entropy.

L63/64 – While Shannon brought Entropy from a data perspective to people's attention, he did not talk about Configurational Entropy in that reference – nor how fast information on

compositional particle distribution is lost through flow. I accept that there is a relationship between standard configurational entropy and Shannon's information entropy. What is "fast information"? I think this sentence and reference needs a bit of work.

We have rephrased this introduction to entropy to make it clear:

*Excerpt 2: "Configurational entropy is analogous to the Shannon entropy (Shannon, 1948) and related to the probabilities derived from the distribution of particles with a certain value, i.e., composition. It can be used to track the mixing of particles independently of the physical process causing that mixing in numerical simulations as well as laboratory experiments."*

L79/80 – a bit strange to talk about – conditional probability – for a deterministic system. Maybe it is the conditional probability of finding this group of particles of composition  $c$  in cell  $j$  out of all other possible configurations. I appreciate that entropy related work is frequently discussed in terms of probability. Maybe it could instead be described as just something like the local proportion of particles of composition  $c$  (measured in terms of density) in cell  $j$ , relative to the total number of particles (measured in terms of density) in cell  $j$ .

See answer below.

L82 – again – maybe rather than the probability for the cell-sum – maybe a more deterministic description can be given here also. Is it just the proportion of all particles (again measured in terms of particle density) in cell  $j$ ?

See answer below.

If this suggestion is taken up for describing these terms, I think it would also be OK to later or before include a statement pointing out that in statistical physics similar terms would be considered probabilities.

We understand that probabilities may indeed not have been the right choice of words for describing the calculated quantities, and we have taken the reviewer's advice by redefining them as proportions:

*Excerpt 3: "From the compositional density  $\rho_{c,j}$  we calculate  $P_{j,c}$  which is the proportion of particles of composition  $c$  in cell  $j$  relative to the total number of particles in the cell, both measured in terms of density through Eq. (2). We calculate  $P_j$  through the cell-sum of all compositional densities in Eq. (3).  $P_j$  is the proportion of the amount of particles in a cell relative to all the particles in the system. The quantities we describe here as proportions would be considered probabilities, or conditional probabilities, in statistical physics."*

L116/117 – The reference quoted states average RMS plate velocities over past 200 Ma of around 4 cm/yr, but your model R presents mean average surface velocities of around 2 cm/yr. I am not sure that is really close enough to say that it is in the range of reconstructed values. Maybe the sentence should be more specific – "the mean surface velocities in the model were  $x$  cm/yr, which can be compared with  $y$  cm/yr reconstructed in Zahirovic et al., 2015."

We have rephrased the sentence:

*Excerpt 4: "The surface velocity in the model were generally between 1 and 4 cm/a, which may be compared to the reconstructed values of 4 cm/a of Zahirovic et al., (2015)..."*

L288 – I feel that ‘primordial’ could be an emotive word here. For most whole Earth geoscientists, primordial suggests something that has survived since Earth’s formation. I appreciate that ‘primordial’ here is taken to mean from the start of the simulation, but I think a more straightforward expression (with less ‘baggage’) could be used. Maybe ‘original’. Speed readers might think that you have demonstrated that large regions of the lower mantle are likely to survive from Earth formation, not just 1000 Myr.

We agree that the term ‘primordial’ is too strong to be used in our model. We have changed it to ‘original’, as suggested, when discussing the results of our models. However, the occurrences of the word remain when discussing potential implications of the entropy on timescales larger than 1000 Ma and more Earth-like models, i.e., kinematically driven by reconstructed velocities.

### Technical Corrections

We appreciate the thorough readthrough by the reviewer and all the suggestions given. We agree on all occasions and have changed the wording in the revised manuscript based on all the suggestions. Also including the definitions at the start of the appendix.

L 16 – ‘stooled’?

L37 – ‘entirely spatial’ – missing word? Different?

L 48 – ‘model the’ – missing word? with?

L69 – not sure if this is a general definition of entropy. I think it is a definition of configurational entropy.

L75 ‘amount particles’ -> amount of particles

L257 – ‘spherical’ resolution – unclear what you mean by spherical here? Do you mean lateral, or ...?

L273 – “that has stays”?

L276-278 – As regards the “a local entropy of 1”, it reads as if you mean the lower mantle composition - where? Anywhere? but that does not make sense - maybe you mean - " and therefore 'the local entropy above 660km' cannot have a local entropy of 1"?

check

L308-309 – ‘illustrates ..... successfully quantifies mixing states’. While this might be suggested visually in a qualitative sense, I am not convinced that it has been shown in a quantitative way. I think it deserves a more accurate and weaker statement. Something that talks to the fact that this was a visual comparison that supports that configuration entropy gives the right ranking of mixing states.

Line 311. From what time in the simulation is this? I presume at the end?

Start of Appendix A – with the equations, I wonder whether  $n_{c,j}$ ,  $N_c$ ,  $M$  and  $C$  can be defined again here. Everything else is in the equations. It would then be complete.

Line 435 - “which is the global entropy is”
